# Supplementary material
Source: Springer Nature journal article supplement (https://www.springermedizin.de/resource/supplementary/12905_2013_369_MOESM1_ESM.pdf/9518736)
Supplement: MOESM1 [file 9518736]

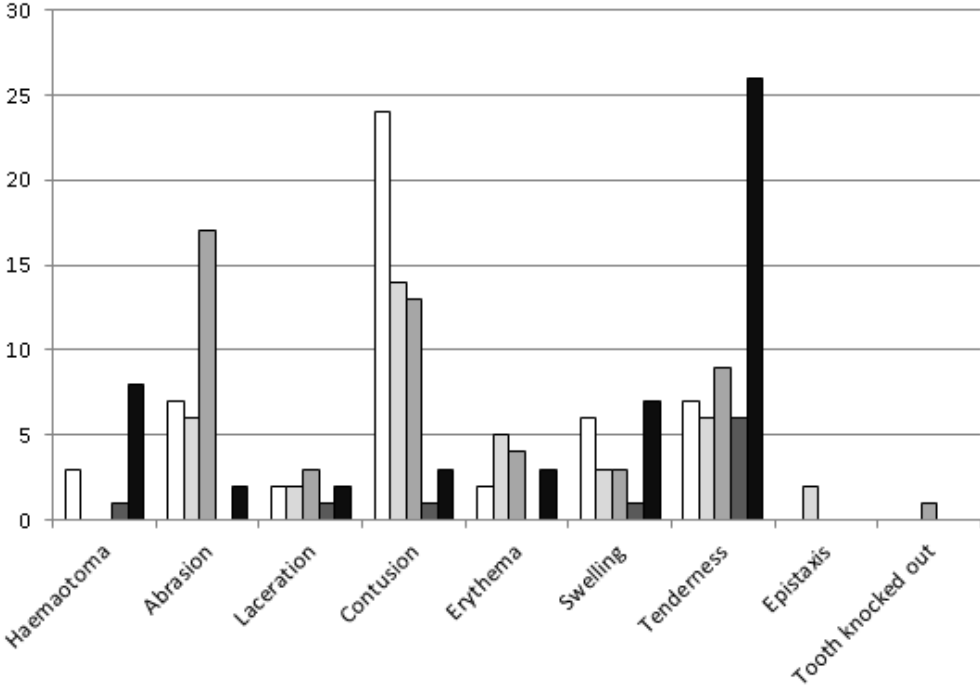

- Upper third (forehead, superior orbit, lateral orbit)
- ▒ Middle third (nasal, maxilla, zygoma)
- ▓ Lower third (mandible, oral)
- Vertex
- Back of the head (temporal, parietal and occipital)
